# Supplementary material for: Tuning the Catalytic Activity of Recyclable Heterogeneous Catalysts for the Direct Etherification Reaction of Glycerol Using Antagonistic Additives
Source: MDPI journal article supplement (doi:10.3390/catal12020220), 2022-02-15
Supplement: s1 [file s1]

# Tuning the catalytic activity of recyclable heterogeneous catalysts for the direct etherification reaction of glycerol using antagonistic additives

Je Seung Lee\*, Eunji Jang, Dae Won Kim and Seo Kyung Park

Department of Chemistry, Kyung Hee University, 26 Kyungheedaero-ro, Dongdaemun-gu, Seoul 02447, Republic of Korea

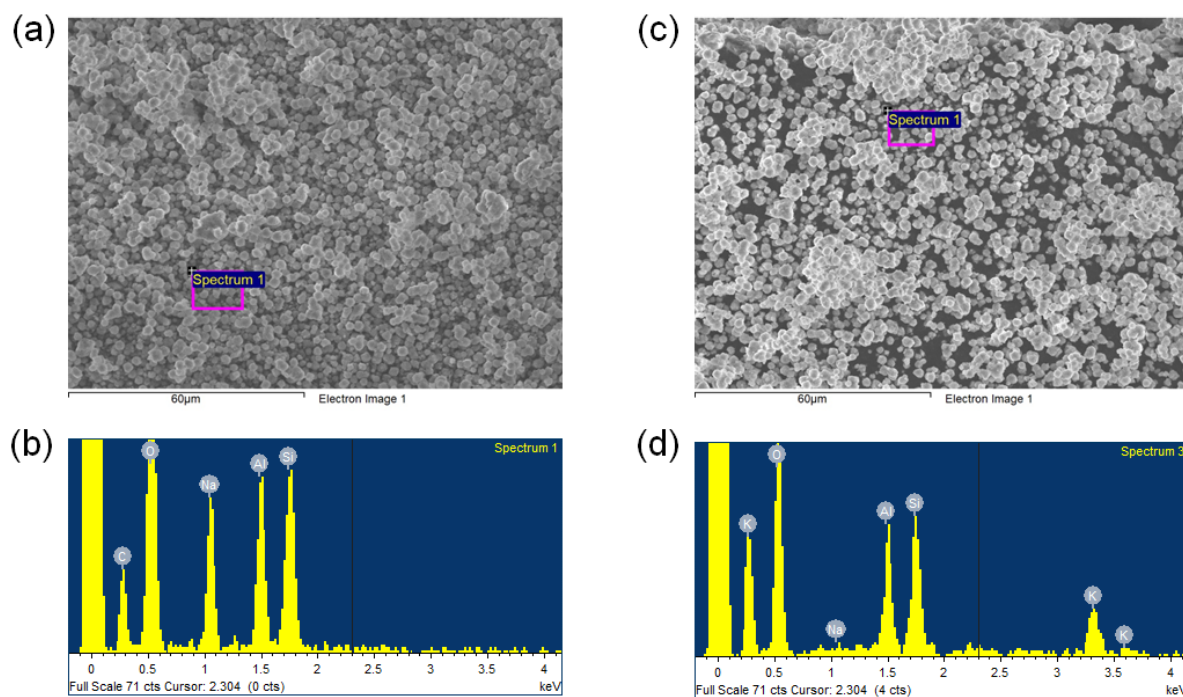

**Figure S1.** SEM images and EDX data of zeolite (a) and (b) Na-zeolite, (c) and (d) K-zeolite, respectively.

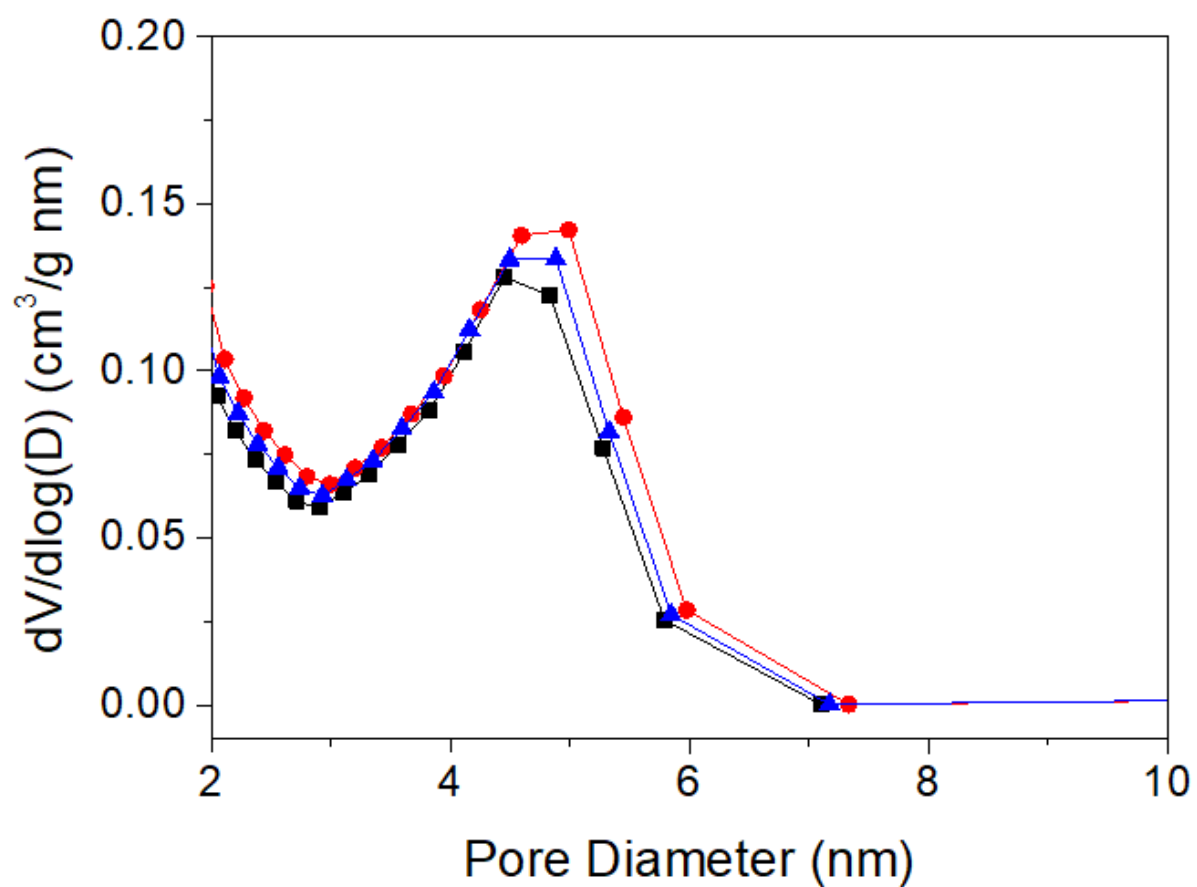

**Figure S2.** BJH pore size distribution plot of XZ-K: (-■-) pristine zeolite, (-●-) after 5 recycles, (-▲-) after 10 recycles.

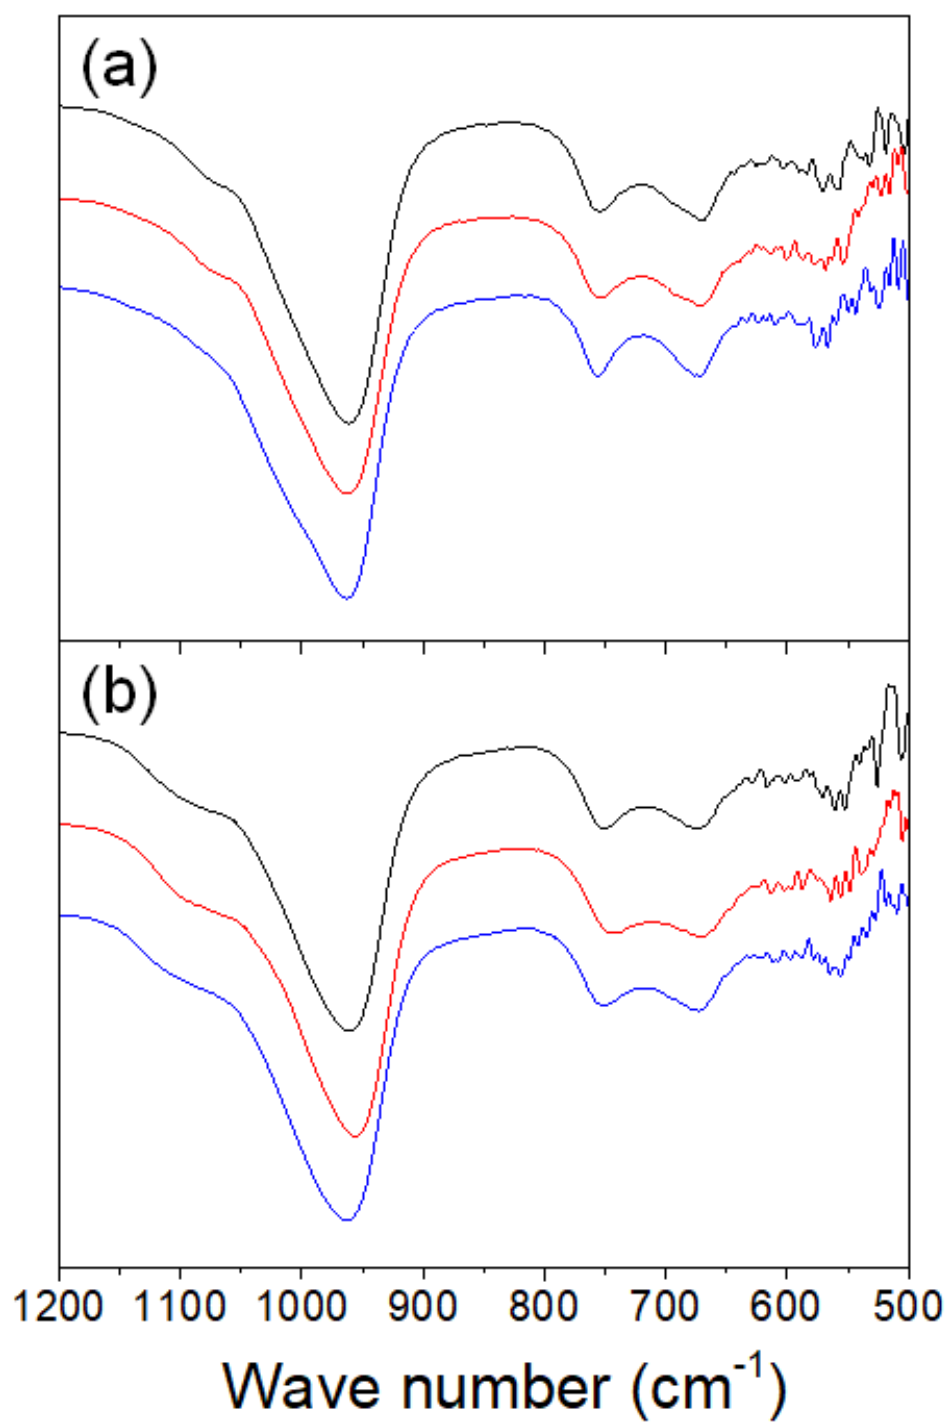

**Figure S3.** FT-IR spectra of (a) XZ-Na and (b) XZ-K: (—) pristine zeolite, (—) after 5 cycles, (—) after 10 cycles.

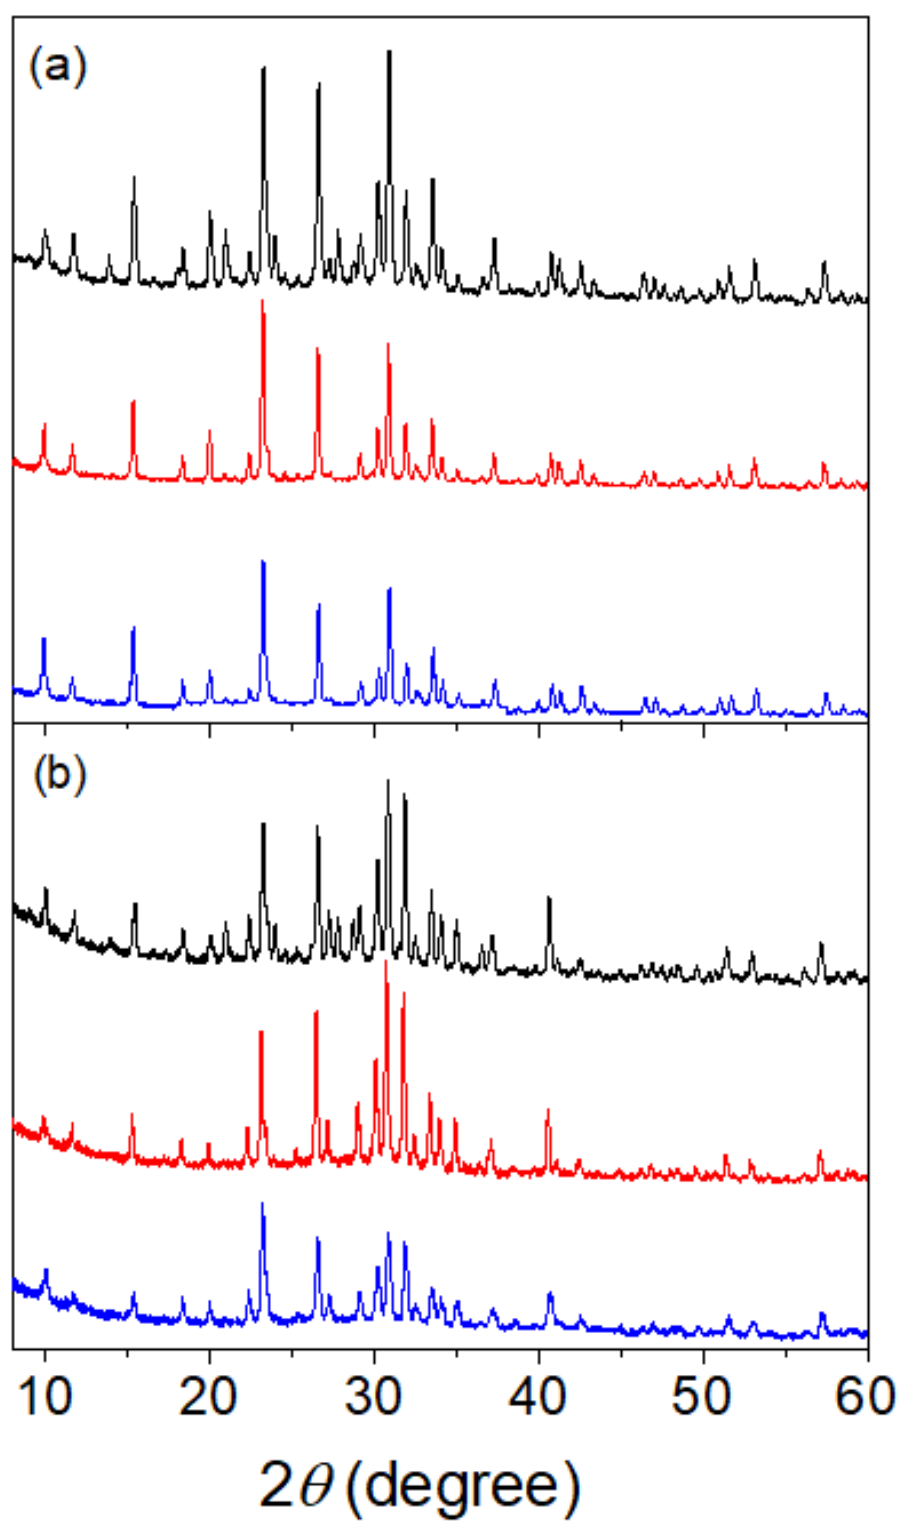

**Figure S4.** XRD patterns of (a) XZ-Na and (b) XZ-K: (—) pristine zeolite, (—) after 5 recycles, (—) after 10 recycles.

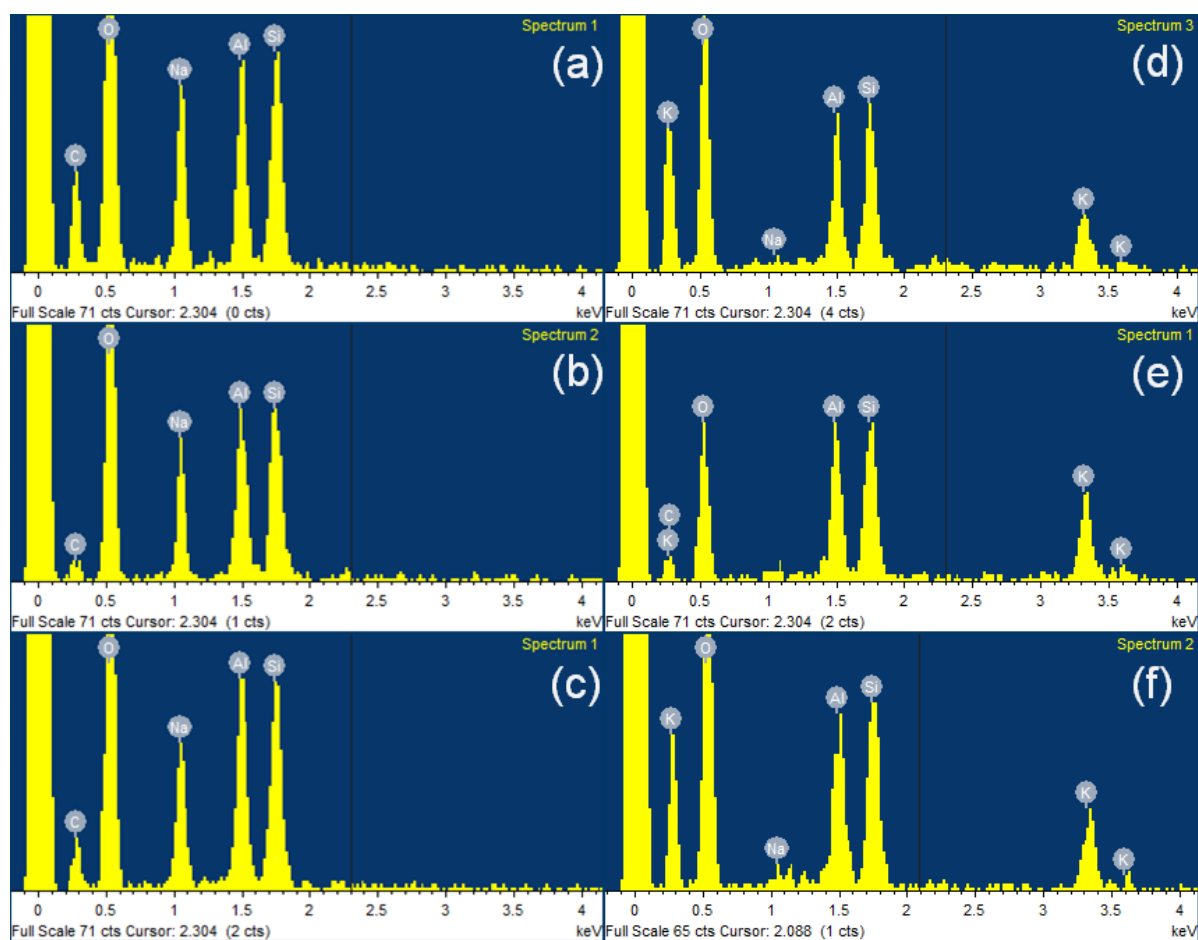

**Figure S5.** EDX data of XZ-Na (a) pristine, (b) after 5<sup>th</sup> recycle, (c) after 10<sup>th</sup> recycle and XZ-K (d) pristine, (e) after 5<sup>th</sup> recycle, (f) after 10<sup>th</sup> recycle, respectively.

**Table S1.** Structural characterization of zeolites

|       | Recycle          | Atomic ratio (%) |       |       |       |       | Surface area<br>(m <sup>2</sup> g <sup>-1</sup> ) | Pore volume<br>(cm <sup>3</sup> g <sup>-1</sup> ) |
|-------|------------------|------------------|-------|-------|-------|-------|---------------------------------------------------|---------------------------------------------------|
|       |                  | O                | Na    | Al    | Si    | K     |                                                   |                                                   |
| XZ-Na | 0 <sup>th</sup>  | 64.65            | 10.26 | 10.47 | 14.62 | -     | 541                                               | 0.27                                              |
|       | 5 <sup>th</sup>  | 64.76            | 10.15 | 10.51 | 14.58 | -     | 528                                               | 0.26                                              |
|       | 10 <sup>th</sup> | 64.87            | 10.03 | 10.56 | 14.54 | -     | 498                                               | 0.25                                              |
| XZ-K  | 0 <sup>th</sup>  | 61.11            | -     | 11.56 | 16.23 | 11.10 | 465                                               | 0.26                                              |
|       | 5 <sup>th</sup>  | 61.00            | -     | 11.52 | 16.14 | 11.34 | 433                                               | 0.25                                              |
|       | 10 <sup>th</sup> | 61.07            | 0.01  | 11.54 | 16.25 | 11.13 | 407                                               | 0.23                                              |

**Table S2.** Recycling of XZ-M for the direct etherification of glycerol

| Cycle No. |                   | 1    | 2    | 3    | 4    | 5    | 6    | 7    | 8    | 9    | 10   |
|-----------|-------------------|------|------|------|------|------|------|------|------|------|------|
| XZ-Na     | Conv. of glycerol | 76.3 | 77.4 | 76.1 | 75.4 | 76.8 | 75.3 | 74.2 | 75.3 | 72.1 | 70.2 |
|           | Yield of DG       | 50.8 | 51.2 | 50.3 | 51.1 | 50.3 | 50.6 | 51.2 | 50.3 | 50.2 | 51.2 |
|           | Yield of TG       | 20.4 | 21.2 | 21.3 | 20.2 | 20.6 | 20.2 | 19.4 | 20.1 | 22.2 | 21.2 |
| XZ-K      | Conv. of glycerol | 85.4 | 85.1 | 84.8 | 85.9 | 86.2 | 84.4 | 85.3 | 84.6 | 84.2 | 83.5 |
|           | Yield of DG       | 54.1 | 55   | 54.3 | 54.5 | 53.8 | 53.6 | 55.1 | 53.9 | 54.2 | 55.2 |
|           | Yield of TG       | 21.3 | 20.2 | 20.8 | 21.2 | 20.1 | 19.6 | 20.2 | 21.1 | 20.4 | 19.9 |
